# Supplementary material
Source: publisher site journal article supplement (https://www.spandidos-publications.com/1564/downloadSupplementary)

Figure S1. Schematic diagram of the experimental procedure. QPRT, quinolate phosphoribosyl transferase; miR, microRNA; IGROV-1/DDP, cisplatin-resistant IGROV-1 cells.

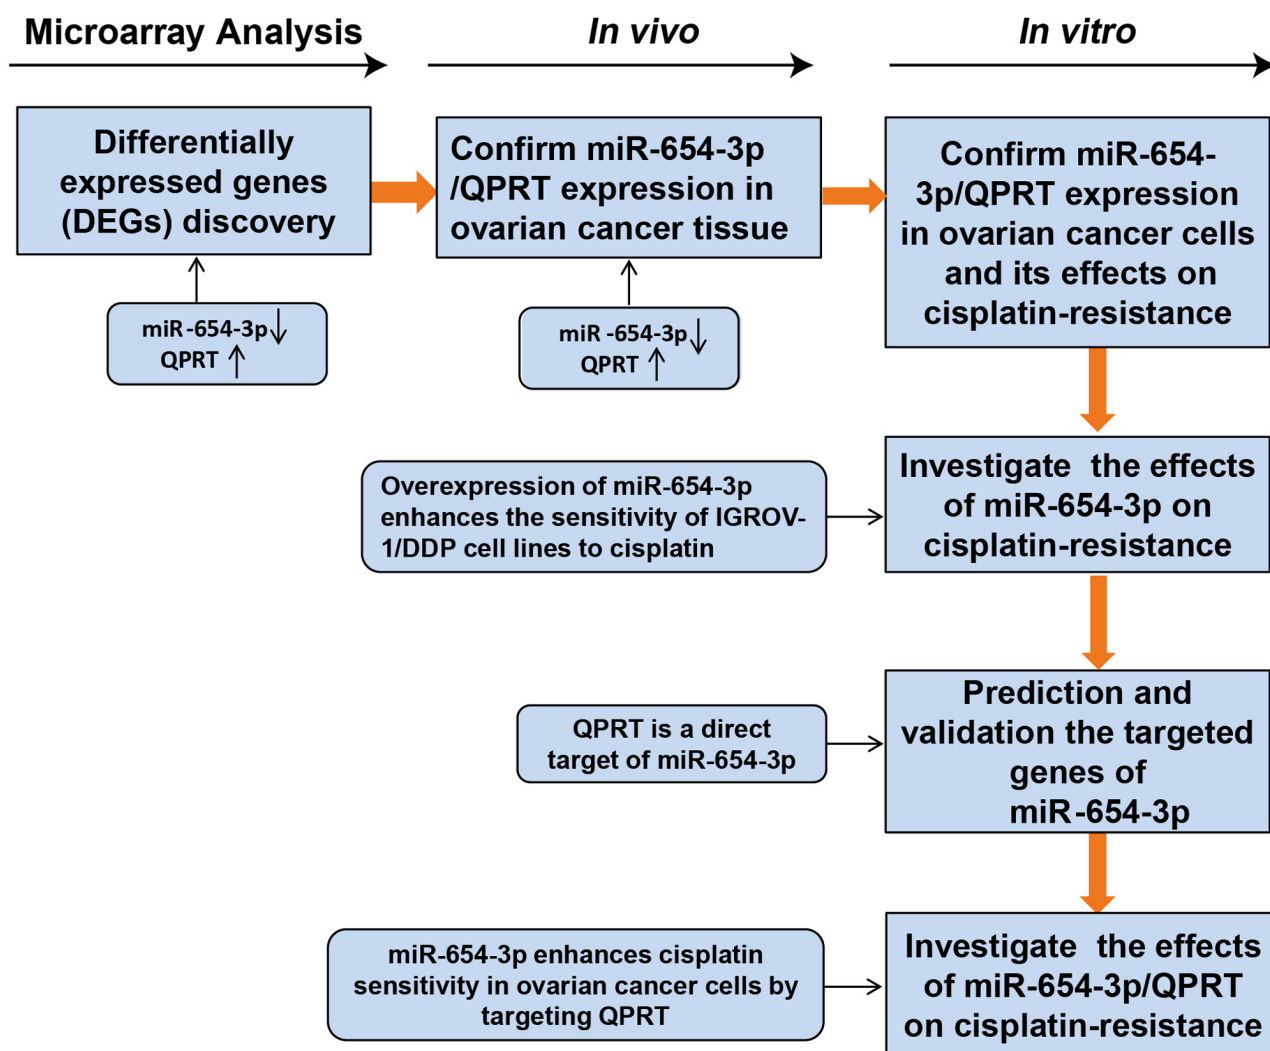

Figure S2. (A) Representative images of BrdU staining. (B) Hoechst 33258 staining. (C) Wound healing assay after different transfection. Scale bar, 100  $\mu$ m.

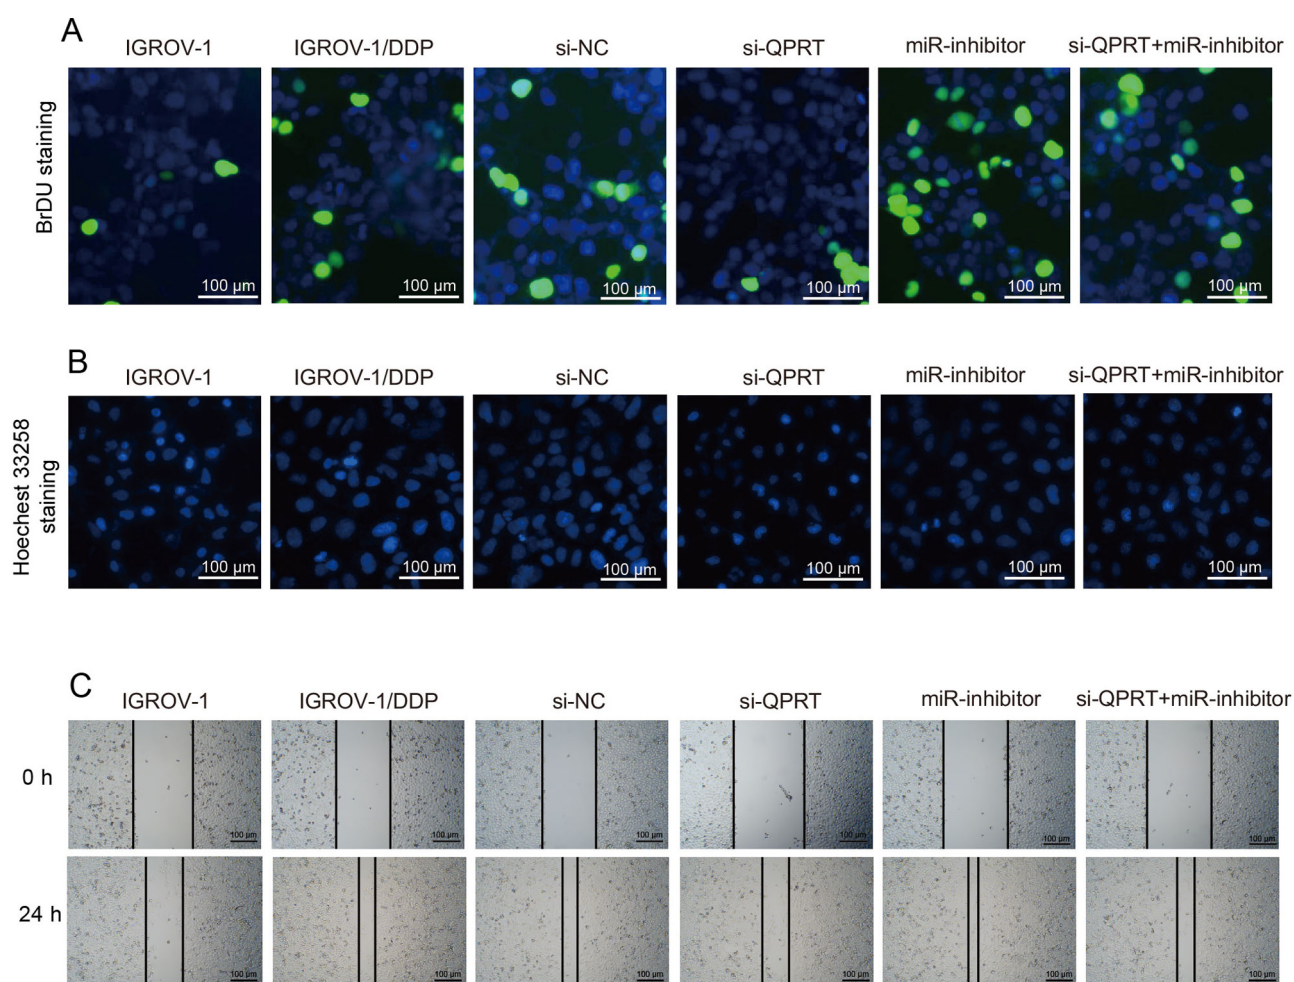

Supplement: Supplementary file 1 [file downloadSupplementary]
